# Supplementary material
Source: Copernicus journal article supplement (doi:10.5194/egusphere-2026-3519)
Supplement: Supplementary file 1 [file egusphere-2026-3519-supplement.pdf]

# Supporting Information for Precision measurement of $\delta^{234}\text{U}$ in annually banded tropical corals

Sahra Greve<sup>1</sup>, Norbert Frank<sup>1,2</sup>, Sophie Warken<sup>1,2</sup>, Paolo Montagna<sup>3,4</sup>, Amos Winter<sup>5</sup>, Serguei Damián Rico-Esenaro<sup>6,7</sup>, Juan P. Carricart-Ganivet<sup>6</sup>, Joan-Albert Sanchez-Cabeza<sup>8</sup>, Ana Carolina Ruiz-Fernández<sup>8</sup>, Carlos Alonso-Hernández<sup>9</sup>, Miguel Gomez-Batista<sup>10</sup>, Marco Taviani<sup>4,11</sup>, Steffen Hetzinger<sup>12</sup>

<sup>1</sup>Institute of Environmental Physics, Heidelberg University, 69120 Heidelberg, Germany

<sup>2</sup>Institute of Earth Science, Heidelberg University, 69120 Heidelberg, Germany

<sup>3</sup>Institute of Polar Sciences, ISP-CNR, Via Gobetti 101, 40129, Bologna, Italy

<sup>4</sup>Stazione Zoologica 'Anton Dohrn', Naples, Italy

<sup>5</sup>Department of Earth and Environmental Systems, Indiana State University, Terre Haute, IN USA

<sup>6</sup>Laboratorio de Esclerocronología de Corales Arrecifales, Unidad Académica de Sistemas Arrecifales, Instituto de Ciencias del Mar y Limnología, Universidad Nacional Autónoma de México, Puerto Morelos, Q. Roo 77580, México

<sup>7</sup>Departamento El Hombre y su Ambiente, Universidad Autónoma Metropolitana Unidad Xochimilco, Coyoacán, Cd. de México 04960, México

<sup>8</sup>Unidad Académica Mazatlán, Instituto de Ciencias del Mar y Limnología, Universidad Nacional Autónoma de México, 82040 Mazatlán, Mexico

<sup>9</sup>IAEA Marine Environment Laboratories 4 Quai Antoine 1er, MC-98000 Monaco, Principality of Monaco

<sup>10</sup>Centro de Estudios Ambientales de Cienfuegos (CEAC), Cienfuegos, Cuba

<sup>11</sup>Institute of Marine Sciences, ISMAR-CNR, Via Gobetti 101, 40129, Bologna, Italy

<sup>12</sup>Christian-Albrechts-Universität zu Kiel, Institut für Geowissenschaften, Kiel, Germany

## Contents of this file

Figures S1 to S3

Tables S1 to S4

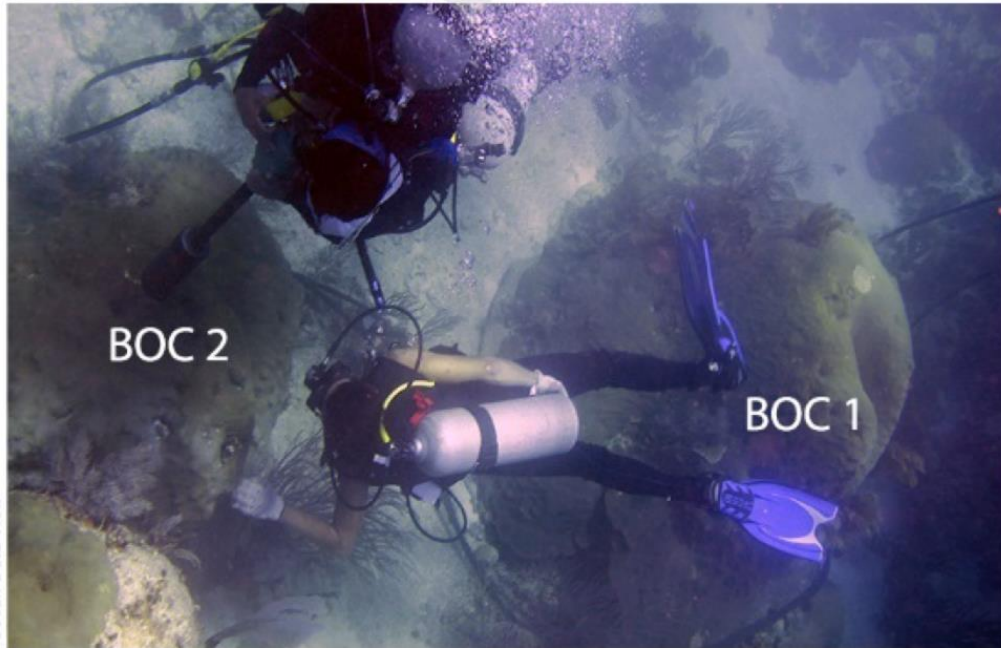

Supplementary Figure S1: La Bocana Reef, Mexico, the underwater image showing proximity of the two sampled coral colonies BOC1 and BOC2

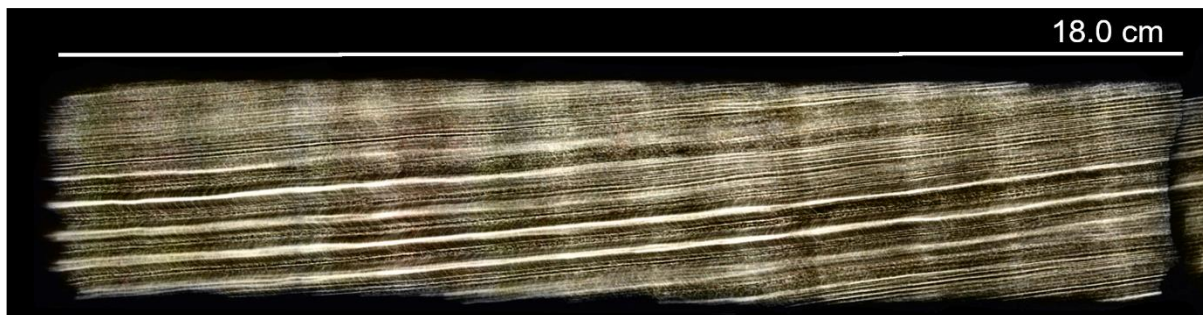

Supplementary Figure S2: Photo with the overlain x-ray image of the Venezuelan ROQ\_V coral core. Semi-annual samples were cut along the density bands, and seasonal samples were archived by halving these density bands.

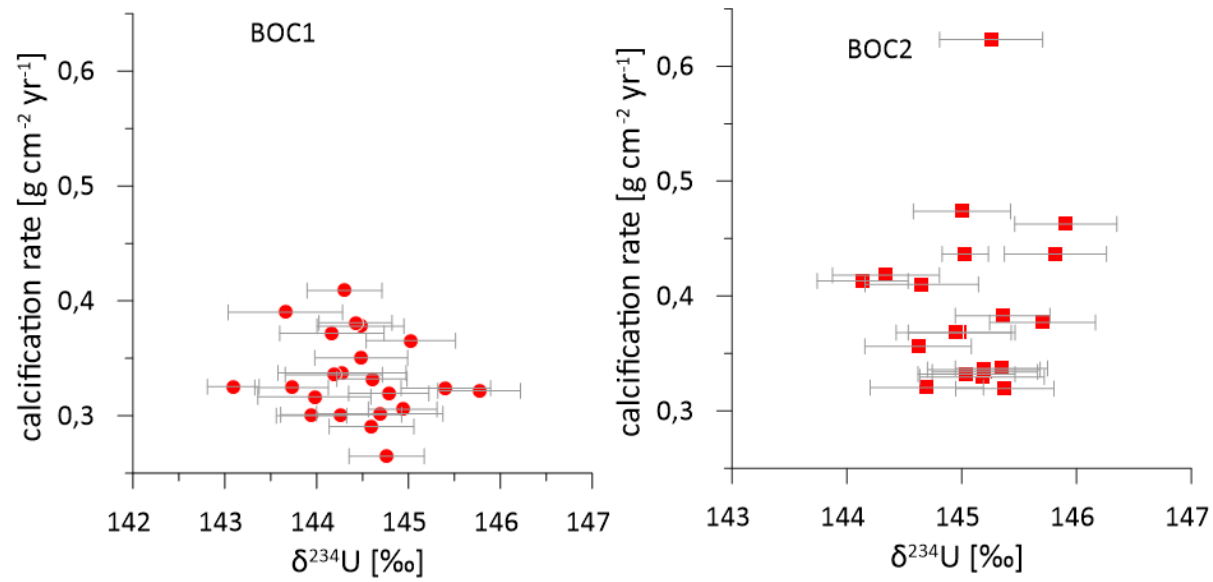

Supplementary Figure S3: no correlation between the calcification rates (Rico-Esenaro et al., 2022) and  $\delta^{234}\text{U}$  values is visible.

**Supplementary Table S1: Cuban Species  $\delta^{234}\text{U}$  measurements together with concentrations of  $^{238}\text{U}$  and  $^{234}\text{U}$  of annually integrated samples.  $\delta^{234}\text{U}$  values are given normalised after (Cheng et al., 2013). Measurement uncertainties are  $2\sigma$  analytical errors**

| sample ID | sample lable                 | Year | $\delta^{234}\text{U}$ (‰) | Error $\delta^{234}\text{U}$ (‰) | $^{234}\text{U}$ (pg/g) | Error $^{234}\text{U}$ (pg/g) | $^{238}\text{U}$ ( $\mu\text{g/g}$ ) | Error $^{238}\text{U}$ ( $\mu\text{g/g}$ ) |
|-----------|------------------------------|------|----------------------------|----------------------------------|-------------------------|-------------------------------|--------------------------------------|--------------------------------------------|
| 12477     | RL_Siderastrea siderea       | 2015 | 146.01                     | 0.59                             | 147.20                  | 0.31                          | 2.37466                              | 0.00016                                    |
| 12478     | RL_Mycetophyllia lamarckiana | 2015 | 145.65                     | 0.44                             | 139.05                  | 0.25                          | 2.24837                              | 0.00010                                    |
| 12480     | RL_Agaricia agaricites       | 2015 | 145.44                     | 0.64                             | 170.26                  | 0.48                          | 2.73821                              | 0.00035                                    |
| 12481     | RL_Meandrina meandites       | 2015 | 146.20                     | 0.54                             | 194.88                  | 0.57                          | 3.11970                              | 0.00016                                    |
| 12482     | RL_Acropora cervicornis      | 2015 | 145.62                     | 0.50                             | 174.16                  | 0.53                          | 2.79614                              | 0.00016                                    |
| 12484     | RL_Colpophyllia natans       | 2015 | 145.65                     | 0.53                             | 114.33                  | 0.13                          | 1.84539                              | 0.00011                                    |
| 12485     | RL_Diploria labyrinthiformis | 2015 | 145.21                     | 0.62                             | 142.79                  | 0.17                          | 2.30343                              | 0.00017                                    |
| 12486     | RL_Colpophyllia natans 2     | 2015 | 145.11                     | 0.52                             | 116.07                  | 0.14                          | 1.87722                              | 0.00011                                    |
| 12487     | RL_Montastraea cavernosa     | 2015 | 145.23                     | 0.51                             | 157.84                  | 0.21                          | 2.55018                              | 0.00015                                    |
| 12490     | RL_Orbicella faveolata       | 2015 | 145.47                     | 0.58                             | 160.94                  | 0.44                          | 2.58431                              | 0.00017                                    |
| 12479     | RL_Acropora palmata          | 2015 | 145.48                     | 0.47                             | 164.04                  | 0.67                          | 2.61844                              | 0.00018                                    |

**Supplementary Table S2: Volume test  $\delta^{234}\text{U}$  measurements together with concentrations of  $^{238}\text{U}$  and  $^{234}\text{U}$  of annually integrated samples.  $\delta^{234}\text{U}$  values are given normalised after (Cheng et al., 2013). Measurement uncertainties are  $2\sigma$  analytical errors**

| sample ID | sample lable  | $\delta^{234}\text{U}$ (‰) | Error $\delta^{234}\text{U}$ (‰) | $^{234}\text{U}$ (pg/g) | Error $^{234}\text{U}$ (pg/g) | $^{238}\text{U}$ ( $\mu\text{g/g}$ ) | Error $^{238}\text{U}$ ( $\mu\text{g/g}$ ) |
|-----------|---------------|----------------------------|----------------------------------|-------------------------|-------------------------------|--------------------------------------|--------------------------------------------|
| 12312     | Mururoa 20mg  | 144.69                     | 0.62                             | 139.58                  | 0.14                          | 2.24378                              | 0.00006                                    |
| 12313     | Mururoa 40mg  | 146.32                     | 1.16                             | 140.36                  | 0.61                          | 2.22908                              | 0.00013                                    |
| 12314     | Mururoa 60mg  | 145.11                     | 0.36                             | 135.24                  | 0.18                          | 2.16803                              | 0.00006                                    |
| 12315     | Mururoa 70mg  | 145.83                     | 0.33                             | 137.25                  | 0.20                          | 2.20175                              | 0.00006                                    |
| 12316     | Mururoa 80mg  | 146.51                     | 0.98                             | 135.85                  | 0.90                          | 2.15256                              | 0.00019                                    |
| 12318     | Mururoa 100mg | 143.92                     | 0.38                             | 135.85                  | 0.44                          | 2.17141                              | 0.00011                                    |
| 12319     | Mururoa 120mg | 145.99                     | 0.34                             | 137.41                  | 0.48                          | 2.18193                              | 0.00016                                    |
| 12320     | Mururoa 150mg | 146.53                     | 0.42                             | 136.10                  | 0.23                          | 2.16909                              | 0.00007                                    |

Supplementary Table S3: ROQV  $\delta^{234}\text{U}$  measurements together with concentrations of  $^{238}\text{U}$  and  $^{234}\text{U}$  of annually integrated samples.  $\delta^{234}\text{U}$  values are given normalised after (Cheng et al., 2013). Measurement uncertainties are  $2\sigma$  analytical errors

| sample ID | sample lable      | Year   | $\delta^{234}\text{U}$ (‰) | Error $\delta^{234}\text{U}$ (‰) | $^{234}\text{U}$ (pg/g) | Error $^{234}\text{U}$ (pg/g) | $^{238}\text{U}$ ( $\mu\text{g/g}$ ) | Error $^{238}\text{U}$ ( $\mu\text{g/g}$ ) |
|-----------|-------------------|--------|----------------------------|----------------------------------|-------------------------|-------------------------------|--------------------------------------|--------------------------------------------|
| 12311     | ROQV_1994.2       | 1993.5 | 144.91                     | 0.33                             | 155.65                  | 0.31                          | 2.50757                              | 0.00011                                    |
| 12310     | ROQV_1994.1       | 1994   | 144.80                     | 0.35                             | 155.54                  | 0.30                          | 2.50137                              | 0.00011                                    |
| 12309     | ROQV_1995.2       | 1994.5 | 144.40                     | 0.39                             | 160.49                  | 0.35                          | 2.59284                              | 0.00010                                    |
| 12308     | ROQV_1995.1       | 1995   | 144.65                     | 0.33                             | 161.45                  | 0.33                          | 2.60346                              | 0.00011                                    |
| 12307     | ROQV_1996.2       | 1995.5 | 145.88                     | 0.54                             | 160.79                  | 0.48                          | 2.58527                              | 0.00014                                    |
| 12306     | ROQV_1996.1       | 1996   | 144.92                     | 0.36                             | 156.80                  | 0.36                          | 2.53474                              | 0.00009                                    |
| 12305     | ROQV_1997.2       | 1996.5 | 145.03                     | 0.33                             | 158.56                  | 0.37                          | 2.56492                              | 0.00011                                    |
| 12304     | ROQV_1997.1       | 1997   | 144.70                     | 0.33                             | 154.98                  | 0.34                          | 2.50879                              | 0.00011                                    |
| 12265     | ROQV_1998.2       | 1997.5 | 143.99                     | 0.55                             | 298.41                  | 1.15                          | 4.87591                              | 0.00025                                    |
| 12264     | ROQV_1998.1       | 1998   | 146.77                     | 0.57                             | 154.54                  | 0.32                          | 2.49571                              | 0.00015                                    |
| 12263     | ROQV_1999.2       | 1998.5 | 144.45                     | 0.47                             | 96.14                   | 0.16                          | 1.55584                              | 0.00009                                    |
| 12262     | ROQV_1999.1       | 1999   | 146.33                     | 0.55                             | 149.29                  | 0.36                          | 2.40941                              | 0.00013                                    |
| 12261     | ROQV_2000.2       | 1999.5 | 146.66                     | 0.57                             | 147.11                  | 0.41                          | 2.36788                              | 0.00015                                    |
| 12260     | ROQV_2000.1       | 2000   | 144.82                     | 0.47                             | 128.50                  | 0.44                          | 2.08210                              | 0.00011                                    |
| 12259     | ROQV_2001.2       | 2000.5 | 142.82                     | 1.29                             | 147.49                  | 1.14                          | 2.39933                              | 0.00152                                    |
| 12258     | ROQV_2001.1       | 2001   | 144.23                     | 0.48                             | 146.22                  | 0.53                          | 2.36402                              | 0.00015                                    |
| 12257     | ROQV_2002.2       | 2001.5 | 146.18                     | 0.58                             | 146.95                  | 0.61                          | 2.37813                              | 0.00030                                    |
| 12256     | ROQV_2002.1       | 2002   | 145.82                     | 0.56                             | 138.28                  | 0.31                          | 2.23030                              | 0.00044                                    |
| 12255     | ROQV_2003.2       | 2002.5 | 145.47                     | 0.44                             | 146.68                  | 0.56                          | 2.35922                              | 0.00054                                    |
| 12254     | ROQV_2003.1       | 2003   | 145.22                     | 0.58                             | 147.75                  | 0.40                          | 2.38306                              | 0.00012                                    |
| 12253     | ROQV_2004.2       | 2003.5 | 144.82                     | 0.60                             | 144.22                  | 0.50                          | 2.32327                              | 0.00017                                    |
| 12252     | ROQV_2004.1       | 2004   | 145.25                     | 0.48                             | 146.90                  | 0.33                          | 2.36592                              | 0.00014                                    |
| 12251     | ROQV_2005.2       | 2004.5 | 145.19                     | 0.42                             | 147.42                  | 0.45                          | 2.36740                              | 0.00016                                    |
| 13279     | ROQV_seas_1996.75 | 1996.8 | 144.63                     | 0.63                             | 147.02                  | 1.35                          | 2.38661                              | 0.00722                                    |
| 13281     | ROQV_seas_1997.25 | 1997.3 | 146.02                     | 0.79                             | 156.56                  | 1.62                          | 2.49205                              | 0.00145                                    |
| 13282     | ROQV_seas_1997.5  | 1997.5 | 143.70                     | 1.10                             | 152.84                  | 1.05                          | 2.40777                              | 0.00052                                    |

|       |                   |        |        |      |        |      |         |         |
|-------|-------------------|--------|--------|------|--------|------|---------|---------|
| 13283 | ROQV_seas_1997.75 | 1997.8 | 144.69 | 0.82 | 153.31 | 0.15 | 2.46696 | 0.00018 |
| 13284 | ROQV_seas_1998    | 1998   | 147.58 | 0.92 | 151.62 | 0.20 | 2.43739 | 0.00049 |
| 13286 | ROQV_seas_1998.5  | 1998.5 | 145.32 | 0.47 | 152.61 | 0.22 | 2.44098 | 0.00011 |
| 13287 | ROQV_seas_1998.75 | 1998.8 | 145.13 | 0.54 | 145.75 | 0.53 | 2.29657 | 0.00030 |
| 13288 | ROQV_seas_1999    | 1999   | 143.69 | 0.74 | 148.44 | 1.07 | 2.36133 | 0.00169 |
| 13289 | ROQV_seas_1999.25 | 1999.3 | 145.49 | 0.68 | 148.99 | 0.74 | 2.44441 | 0.00037 |
| 13290 | ROQV_seas_1999.5  | 1999.5 | 144.27 | 0.66 | 148.19 | 0.88 | 2.41089 | 0.00045 |
| 13292 | ROQV_seas_2000    | 2000   | 146.85 | 0.92 | 154.09 | 0.62 | 2.52346 | 0.00153 |
| 13293 | ROQV_seas_2000.25 | 2000.3 | 145.29 | 0.62 | 153.35 | 1.81 | 2.43387 | 0.00109 |
| 13294 | ROQV_seas_2000.5  | 2000.5 | 145.66 | 0.46 | 142.33 | 0.15 | 2.28296 | 0.00011 |
| 13295 | ROQV_seas_2000.75 | 2000.8 | 145.81 | 0.43 | 157.09 | 0.43 | 2.43321 | 0.00021 |
| 13296 | ROQV_seas_2001    | 2001   | 146.23 | 0.54 | 142.33 | 0.15 | 2.28296 | 0.00011 |

**Supplementary Table S4: BOC\_1 and BOC\_2  $\delta^{234}\text{U}$  measurements together with concentrations of  $^{238}\text{U}$  and  $^{234}\text{U}$  of annually integrated samples.  $\delta^{234}\text{U}$  values are given normalised after (Cheng et al., 2013). Measurement uncertainties are  $2\sigma$  analytical errors**

| sample ID | sample lable     | Year | $\delta^{234}\text{U}$ (‰) | Error $\delta^{234}\text{U}$ (‰) | $^{234}\text{U}$ (pg/g) | Error $^{234}\text{U}$ (pg/g) | $^{238}\text{U}$ (µg/g) | Error $^{238}\text{U}$ (µg/g) |
|-----------|------------------|------|----------------------------|----------------------------------|-------------------------|-------------------------------|-------------------------|-------------------------------|
| 12662     | BOC_2_piece_1994 | 1994 | 145.36                     | 0.41                             | 176.39                  | 0.57                          | 2.84157                 | 0.00016                       |
| 12663     | BOC_2_piece_1995 | 1995 | 145.70                     | 0.46                             | 173.85                  | 0.40                          | 2.79826                 | 0.00012                       |
| 12664     | BOC_2_piece_1996 | 1996 | 145.20                     | 0.46                             | 170.72                  | 0.45                          | 2.76238                 | 0.00013                       |
| 12665     | BOC_2_piece_1997 | 1997 | 145.35                     | 0.40                             | 176.94                  | 0.58                          | 2.85947                 | 0.00020                       |
| 12666     | BOC_2_piece_1998 | 1998 | 145.38                     | 0.43                             | 179.63                  | 0.67                          | 2.91201                 | 0.00017                       |
| 12667     | BOC_2_piece_1999 | 1999 | 144.98                     | 0.45                             | 180.57                  | 0.48                          | 2.91889                 | 0.00018                       |
| 12668     | BOC_2_piece_2001 | 2001 | 144.14                     | 0.40                             | 171.35                  | 0.51                          | 2.78035                 | 0.00014                       |
| 12669     | BOC_2_piece_2002 | 2002 | 145.04                     | 0.42                             | 173.65                  | 0.54                          | 2.82173                 | 0.00016                       |
| 12670     | BOC_2_piece_2003 | 2003 | 145.03                     | 0.20                             | 181.23                  | 0.23                          | 2.92659                 | 0.00007                       |
| 12671     | BOC_2_piece_2004 | 2004 | 144.95                     | 0.52                             | 174.24                  | 0.43                          | 2.82595                 | 0.00014                       |
| 12672     | BOC_2_piece_2005 | 2005 | 144.70                     | 0.49                             | 176.21                  | 0.70                          | 2.86372                 | 0.00013                       |
| 12673     | BOC_2_piece_2006 | 2006 | 145.18                     | 0.54                             | 180.24                  | 0.70                          | 2.94112                 | 0.00022                       |
| 12674     | BOC_2_piece_2007 | 2007 | 145.19                     | 0.49                             | 173.31                  | 0.51                          | 2.81876                 | 0.00015                       |

|       |                   |      |        |      |        |      |         |         |
|-------|-------------------|------|--------|------|--------|------|---------|---------|
| 12675 | BOC_2_piece_2008  | 2008 | 145.00 | 0.42 | 168.10 | 0.50 | 2.73091 | 0.00015 |
| 12676 | BOC_2_piece_2009  | 2009 | 144.65 | 0.49 | 174.77 | 0.53 | 2.83265 | 0.00017 |
| 12677 | BOC_2_piece_2010  | 2010 | 144.34 | 0.47 | 170.15 | 0.55 | 2.75220 | 0.00016 |
| 12678 | BOC_2_piece_2011  | 2011 | 145.91 | 0.44 | 165.29 | 0.52 | 2.68210 | 0.00011 |
| 12679 | BOC_2_piece_2012  | 2012 | 145.82 | 0.44 | 163.26 | 0.44 | 2.64808 | 0.00019 |
| 12680 | BOC_2_piece_2013  | 2013 | 145.26 | 0.45 | 164.58 | 0.44 | 2.66412 | 0.00016 |
| 12682 | BOC_2_piece_2015  | 2015 | 144.62 | 0.46 | 159.45 | 0.47 | 2.58012 | 0.00019 |
| 12581 | BOC_2_pulver_2005 | 2005 | 145.68 | 0.55 | 175.27 | 0.41 | 2.82260 | 0.00013 |
| 12582 | BOC_2_pulver_2006 | 2006 | 145.17 | 0.60 | 182.29 | 0.79 | 2.93549 | 0.00025 |
| 12583 | BOC_2_pulver_2007 | 2007 | 145.85 | 0.56 | 175.27 | 0.41 | 2.82260 | 0.00013 |
| 12584 | BOC_2_pulver_2008 | 2008 | 145.34 | 0.56 | 167.96 | 0.60 | 2.71213 | 0.00019 |
| 12585 | BOC_2_pulver_2009 | 2009 | 144.58 | 0.56 | 173.59 | 0.60 | 2.82018 | 0.00017 |
| 12586 | BOC_2_pulver_2010 | 2010 | 144.05 | 0.54 | 160.24 | 0.58 | 2.57853 | 0.00017 |
| 12587 | BOC_2_pulver_2011 | 2011 | 144.02 | 0.59 | 162.26 | 0.68 | 2.60320 | 0.00019 |
| 12588 | BOC_2_pulver_2012 | 2012 | 145.53 | 0.60 | 159.20 | 0.67 | 2.56244 | 0.00018 |
| 12589 | BOC_2_pulver_2013 | 2013 | 144.27 | 0.64 | 167.09 | 0.83 | 2.67359 | 0.00024 |
| 12590 | BOC_2_pulver_2014 | 2014 | 144.78 | 0.46 | 167.60 | 0.52 | 2.68783 | 0.00015 |
| 12558 | BOC_1_pulver_2007 | 2007 | 144.61 | 0.69 | 168.35 | 0.89 | 2.70404 | 0.00097 |
| 12559 | BOC_1_pulver_2008 | 2008 | 144.90 | 0.53 | 181.16 | 0.68 | 2.91181 | 0.00020 |
| 12560 | BOC_1_pulver_2009 | 2009 | 145.13 | 0.46 | 168.46 | 0.51 | 2.71257 | 0.00013 |
| 12561 | BOC_1_pulver_2010 | 2010 | 144.72 | 0.51 | 175.53 | 0.68 | 2.81771 | 0.00018 |
| 12562 | BOC_1_pulver_2011 | 2011 | 144.18 | 0.58 | 186.13 | 0.68 | 2.98531 | 0.00020 |
| 12563 | BOC_1_pulver_2012 | 2012 | 146.12 | 0.61 | 169.52 | 0.46 | 2.72677 | 0.00013 |
| 12564 | BOC_1_pulver_2013 | 2013 | 144.74 | 0.46 | 164.82 | 0.60 | 2.66585 | 0.00012 |
| 12565 | BOC_1_pulver_2014 | 2014 | 145.00 | 0.57 | 158.26 | 0.70 | 2.53675 | 0.00016 |
| 12566 | BOC_1_pulver_2015 | 2015 | 144.75 | 0.53 | 164.21 | 0.63 | 2.64247 | 0.00023 |
| 12567 | BOC_1_pulver_2016 | 2016 | 145.38 | 0.49 | 159.24 | 0.50 | 2.55828 | 0.00012 |
| 12751 | BOC_1_piece_1992  | 1992 | 144.69 | 0.69 | 175.97 | 0.57 | 2.85574 | 0.00017 |
| 12370 | BOC_1_piece_1993  | 1993 | 144.27 | 0.66 | 164.35 | 0.38 | 2.65053 | 0.00012 |
| 12371 | BOC_1_piece_1994  | 1994 | 143.98 | 0.62 | 159.80 | 0.40 | 2.57821 | 0.00011 |

|       |                  |      |        |      |        |      |         |         |
|-------|------------------|------|--------|------|--------|------|---------|---------|
| 12372 | BOC_1_piece_1995 | 1995 | 144.61 | 0.50 | 169.01 | 0.54 | 2.72030 | 0.00013 |
| 12373 | BOC_1_piece_1996 | 1996 | 143.73 | 0.40 | 148.60 | 0.38 | 2.40412 | 0.00010 |
| 12374 | BOC_1_piece_1997 | 1997 | 144.76 | 0.41 | 168.31 | 0.32 | 2.69140 | 0.00011 |
| 12375 | BOC_1_piece_1998 | 1998 | 144.89 | 0.43 | 168.37 | 0.49 | 2.72195 | 0.00013 |
| 12376 | BOC_1_piece_1999 | 1999 | 143.94 | 0.38 | 146.78 | 2.67 | 2.58595 | 0.00077 |
| 12377 | BOC_1_piece_2000 | 2000 | 144.28 | 0.70 | 158.83 | 0.72 | 2.57350 | 0.00020 |
| 12378 | BOC_1_piece_2001 | 2001 | 144.05 | 0.52 | 168.47 | 0.33 | 2.72502 | 0.00013 |
| 12379 | BOC_1_piece_2002 | 2002 | 144.19 | 0.53 | 174.09 | 0.36 | 2.81713 | 0.00013 |
| 12380 | BOC_1_piece_2003 | 2003 | 144.60 | 0.38 | 171.94 | 1.39 | 2.75097 | 0.00028 |
| 12381 | BOC_1_piece_2004 | 2004 | 143.56 | 0.48 | 164.71 | 0.59 | 2.65459 | 0.00015 |
| 12382 | BOC_1_piece_2005 | 2005 | 144.17 | 0.57 | 166.32 | 0.33 | 2.68830 | 0.00011 |
| 12383 | BOC_1_piece_2006 | 2006 | 143.66 | 0.62 | 120.66 | 0.25 | 1.94520 | 0.00008 |
| 12267 | BOC_1_piece_2008 | 2008 | 144.79 | 0.44 | 165.45 | 0.21 | 2.65794 | 0.00006 |
| 12268 | BOC_1_piece_2009 | 2009 | 144.94 | 0.37 | 165.95 | 0.18 | 2.65956 | 0.00006 |
| 12269 | BOC_1_piece_2010 | 2010 | 143.60 | 0.31 | 171.61 | 0.21 | 2.75950 | 0.00006 |
| 12270 | BOC_1_piece_2011 | 2011 | 143.09 | 0.28 | 173.96 | 0.17 | 2.79949 | 0.00006 |
| 12271 | BOC_1_piece_2012 | 2012 | 145.77 | 0.45 | 173.31 | 0.31 | 2.77193 | 0.00022 |
| 12272 | BOC_1_piece_2013 | 2013 | 145.78 | 0.38 | 174.60 | 0.44 | 2.79230 | 0.00013 |

Cheng, H., Lawrence Edwards, R., Shen, C.-C., Polyak, V. J., Asmerom, Y., Woodhead, J., Hellstrom, J., Wang, Y., Kong, X., Spötl, C., Wang, X., & Calvin Alexander, E. (2013). Improvements in 230Th dating, 230Th and 234U half-life values, and U–Th isotopic measurements by multi-collector inductively coupled plasma mass spectrometry. *Earth and Planetary Science Letters*, 371-372, 82-91. <https://doi.org/10.1016/j.epsl.2013.04.006>

Rico-Esenaro, S., Sanchez-Cabeza, J.-A., Ruiz-Fernández, A., Montagna, P., & Carricart-Ganivet, J. P. (2022). Comparison of 100 Years of Growth in Two Nearby Coral Colonies of *Orbicella Faveolata* and Their Relationship with Climatic Oscillations in the Mexican Caribbean. *SSRN Electronic Journal*. <https://doi.org/10.2139/ssrn.4264477>
